# Supplementary material
Source: PubMed Central journal article supplement (PMC3249066)
Supplement: supp_M111.298117_jbc.M111.298117-1.pdf [file supp_M111.298117_jbc.M111.298117-1.pdf]

## SUPPLEMENTAL FIGURES

**Fig. S1. Knockdown of FAK does not affect the formation of peripheral adhesion complexes induced by Palm-PTK6-YF.** A) PC3 cells expressing Palm-PTK6-YF were transfected with FAK siRNAs or control siRNAs for 3 days. Cells were stained with anti-phospho-tyrosine antibodies and visualized with FITC (green). Cells were counterstained with DAPI (blue). Size bar denotes 20  $\mu\text{m}$ . Phase contrast images are also shown. Size bar denotes 50  $\mu\text{m}$ . B) Immunoblot analysis of total cell lysates of PC3 cells described in A was performed with anti-FAK and  $\beta$ -actin antibodies.

**Fig. S2. Tandem mass spectrometry of p130CAS protein phosphorylated by PTK6 in vitro.** A) A schematic structure of p130CAS protein shows that it contains four discrete domains: an SH3 domain, a substrate domain, a 4-helix bundle (4HB), and an evolutionarily conserved C-terminal domain. B) Eleven tyrosine residues of p130CAS phosphorylated by PTK6 were identified by microcapillary liquid chromatography tandem mass spectrometry (LC/MS/MS). No phosphorylation was detected in the Y<sub>664</sub>DYVHL motif, probably due to low peptide sequence coverage of this tyrosine residue. \* Tyrosine residues 165 and 664 were shown to be directly targeted by PTK6 by using phospho-p130CAS Y165 and Y664 antibodies.

# Figure S1

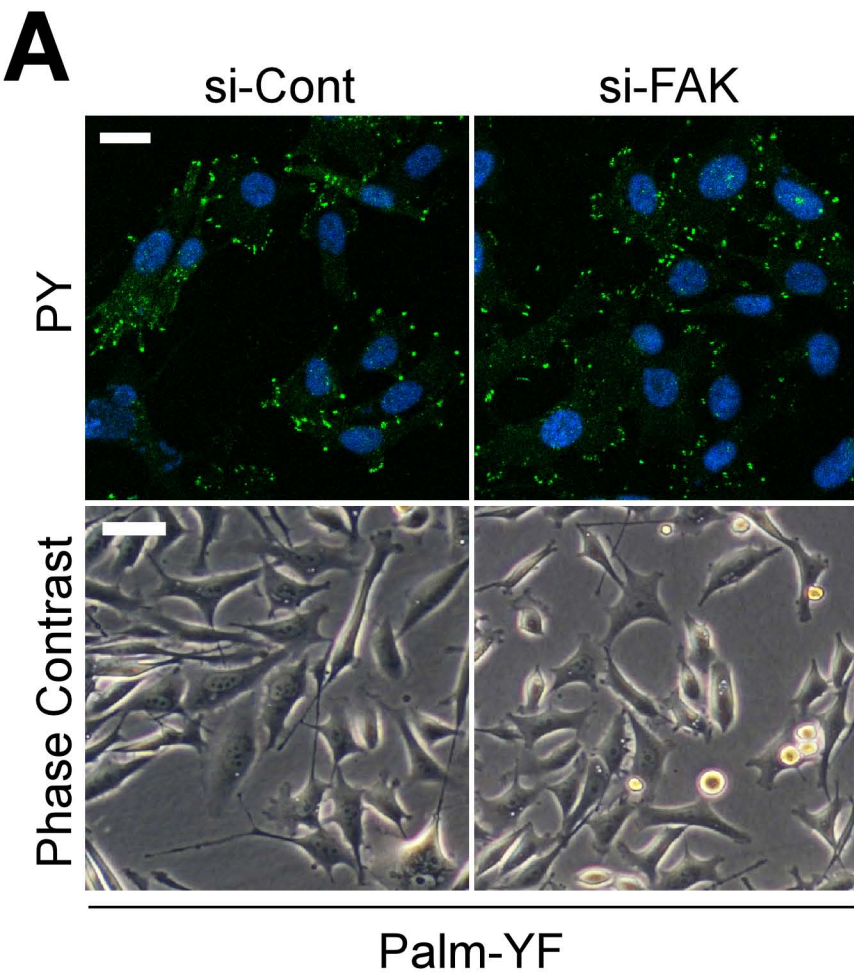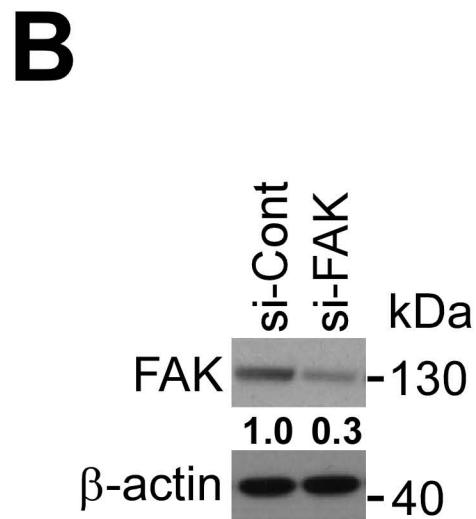

**Figure S2****A**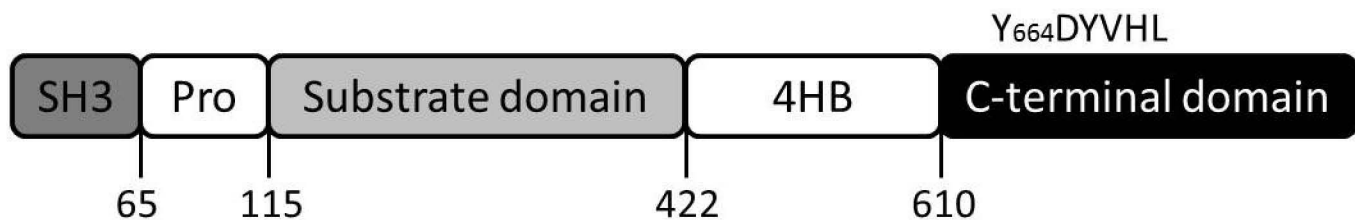**p130CAS****B**

| Tyrosine site | Sequence    |
|---------------|-------------|
| Y165*         | PATDLYQVPPG |
| Y224          | GQGYVYEAAQP |
| Y234          | PEQDEYDIPRH |
| Y249          | GPQDIYDVPPV |
| Y262          | LLPSQYGQEVY |
| Y267          | YGQEVYDTPPM |
| Y287          | PLLEVYDVPPS |
| Y306          | NHHAVYDVPPS |
| Y327          | LREETYDVPPA |
| Y362          | PAEDVYDVPPP |
| Y387          | GPGTLYDVPRE |
| Y664*         | GWMEDYDYVHL |
